# Supplementary material
Source: publisher site journal article supplement (https://www.dovepress.com/article/287881)
Supplement: Supplementary file 1 [file get_supplementary_file.php]

**Supplemental Table 1** Checklist for Reporting Results of Internet E-Surveys (CHERRIES).

Reference: Eysenbach G. (2004) Improving the quality of Web surveys: the Checklist for Reporting Results of Internet E-Surveys (CHERRIES) J Med Internet Res 6(3):e34 doi:10.2196/jmir.6.3.e34

| Item Category / Checklist Item | Explanation | Location in paper |
| --- | --- | --- |
| Design | | |
| Survey design | Open online survey. | Methods section |
| Institutional Review Board (IRB) approval and informed consent process | | |
| IRB approval | Anonymous surveys do not fall under the scope of the Swiss Human Research Act. Thus, a formal ethical approval is not mandatory. | Methods section |
| Informed consent | At the welcome page of the survey, all participants had to accept an informed consent statement. By starting the survey procedure, participants declared consent to participate. The statement consists of the purpose of the study, gave information and contact data of the conducting institute, and reveal potential conflict of interests. All participants agreed that their data were used for a scientific analysis and that the data were published in an international peer reviewed journal. | Methods section |
| Data protection | Guaranteed by the responsible researchers’ personal login to the Survey Monkey account with user name and password. | Checklist only |
| Development and pre-testing | | |
| Development and testing | The survey items were constructed by the research team and pasted into the Survey Monkey area by the responsible researcher. Procedure and items of the survey were pre-tested, adapted and approved by the research team. | Checklist only |
| Recruitment process and description of the sample having access to the questionnaire | | |
| Open survey versus closed survey | Open survey. | Methods section |
| Contact mode | By email. | Methods section |
| Advertising the survey | None. | Checklist only |
| Survey administration | | |
| Web/E-mail | Survey Monkey Tool. | Methods section |
| Context | Survey Monkey is a website for constructing, storing and analyzing online surveys. The website appearance was neutral and was not suggesting any opinion. | Checklist only |
| Mandatory/voluntary | Participation was voluntary. | Methods section |
| Incentives | All participants receive a 20% discount voucher for further purchases (not restricted to the subject of the study). | Checklist only |
| Time/Date | The survey was open from 19.06.2020 to 04.09.2020 | Methods section |
| Randomization of items or questionnaires | No | Checklist only |
| Adaptive questioning | Yes | Methods section |
| Number of Items | 36 | Methods section |
| Number of screens (pages) | 13 | Methods section |
| Completeness check | All answers were voluntary. We included no completeness checks during the survey. | Checklist only |
| Review step | Participants hat the option to switch between pages by using «go back to» and «proceed» buttons, and to change answers. | Checklist only |
| Response rates | | |
| Unique site visitor | Only participants or visitors completing at least the first page and proceeding to the next page were counted. Thus, calculation of views or participation rates is not possible. | Checklist only |
| Completion rate | 95% | Checklist only |
| Preventing multiple entries from the same individual | | |
| Cookies used | Only one participation per device was possible, using cookies for this purpose. | Methods section |
| IP check | No | Checklist only |
| Log file analysis | See above. Participants had the option of multiple participation only if the deleted cookies from their device or if the accessed the survey website from another device. | Checklist only |
| Registration | No | Checklist only |
| Analysis | | |
| Handling of incomplete questionnaires | Incomplete answers were reported descriptive. | Methods section |
| Questionnaires submitted with an atypical timestamp | Average time of access was recorded, but there was no cut-off for a minimal time required. | Checklist only |
| Statistical correction | In case of obvious wrong answers (especially in cases of adaptive questions), data were corrected. | Checklist only |

**Supplemental Table 2**: Change in medication intake because of dietary supplement usage

|  | Prior usage | Stop | Reduced dosage | No change / other |
| --- | --- | --- | --- | --- |
| Drugs | N Prescriptions=38 | 17 | 16 | 5 |
| Antidepressants | 8 (14.5) | 4 (10.5) | 2 (5.3) | 2 (5.3) |
| Hypnotics | 6 (10.9) | 2 (5.3) | 3 (7.9) | 1 (2.6) |
| Melatonin | 7 (12.7) | 4 (10.5) | 3 (7.9) |  |
| Serotonin or precursor of serotonin | 4 (7.3) | 2 (5.3) | 2 (5.3) |  |
| Other hormones | 4 (7.3) | 2 (5.3) | 2 (5.3) |  |
| Benzodiazepines | 4 (7.3) | 3 (7.9) | 1 (2.6) |  |
| Antihistamines | 2 (3.6) |  | 1 (2.6) | 1 (2.6) |
| Dopamine agonists | 1 (1.8) |  |  | 1 (2.6) |
| Other | 2 (3.6) |  | 2 (5.3) |  |
| Herbals | N Prescriptions=32 | 18 | 9 | 5 |
| Sleeping pills | 18 (32.7) | 10 (31.2) | 7 (21.9) | 1 (3.1) |
| Anxiolytics | 6 (10.9) | 4 (12.5) | 1 (3.1) | 1 (3.1) |
| Antidepressant | 1 (1.8) | 1 (3.1) |  |  |
| Ashwagandha | 1 (1.8) | 1 (3.1) |  |  |
| Other | 6 (10.9) | 2 (6.2) | 1 (3.1) | 3 (9.4) |

Results are reported as absolute numbers and percentage (in parenthesis). Relative values refer to the proportion of participants reported taking medications (column “prior usage”) and to the corresponding class of medication (column “stop”, “reduced dosage”, and “no change / other”).
